# Supplementary material for: Targeting RPA promotes autophagic flux and the antitumor response to radiation in nasopharyngeal carcinoma
Source: Springer Nature journal article supplement (doi:10.1186/s12967-023-04574-w), 2023-10-19
Supplement: MOESM1 [file 26202180]

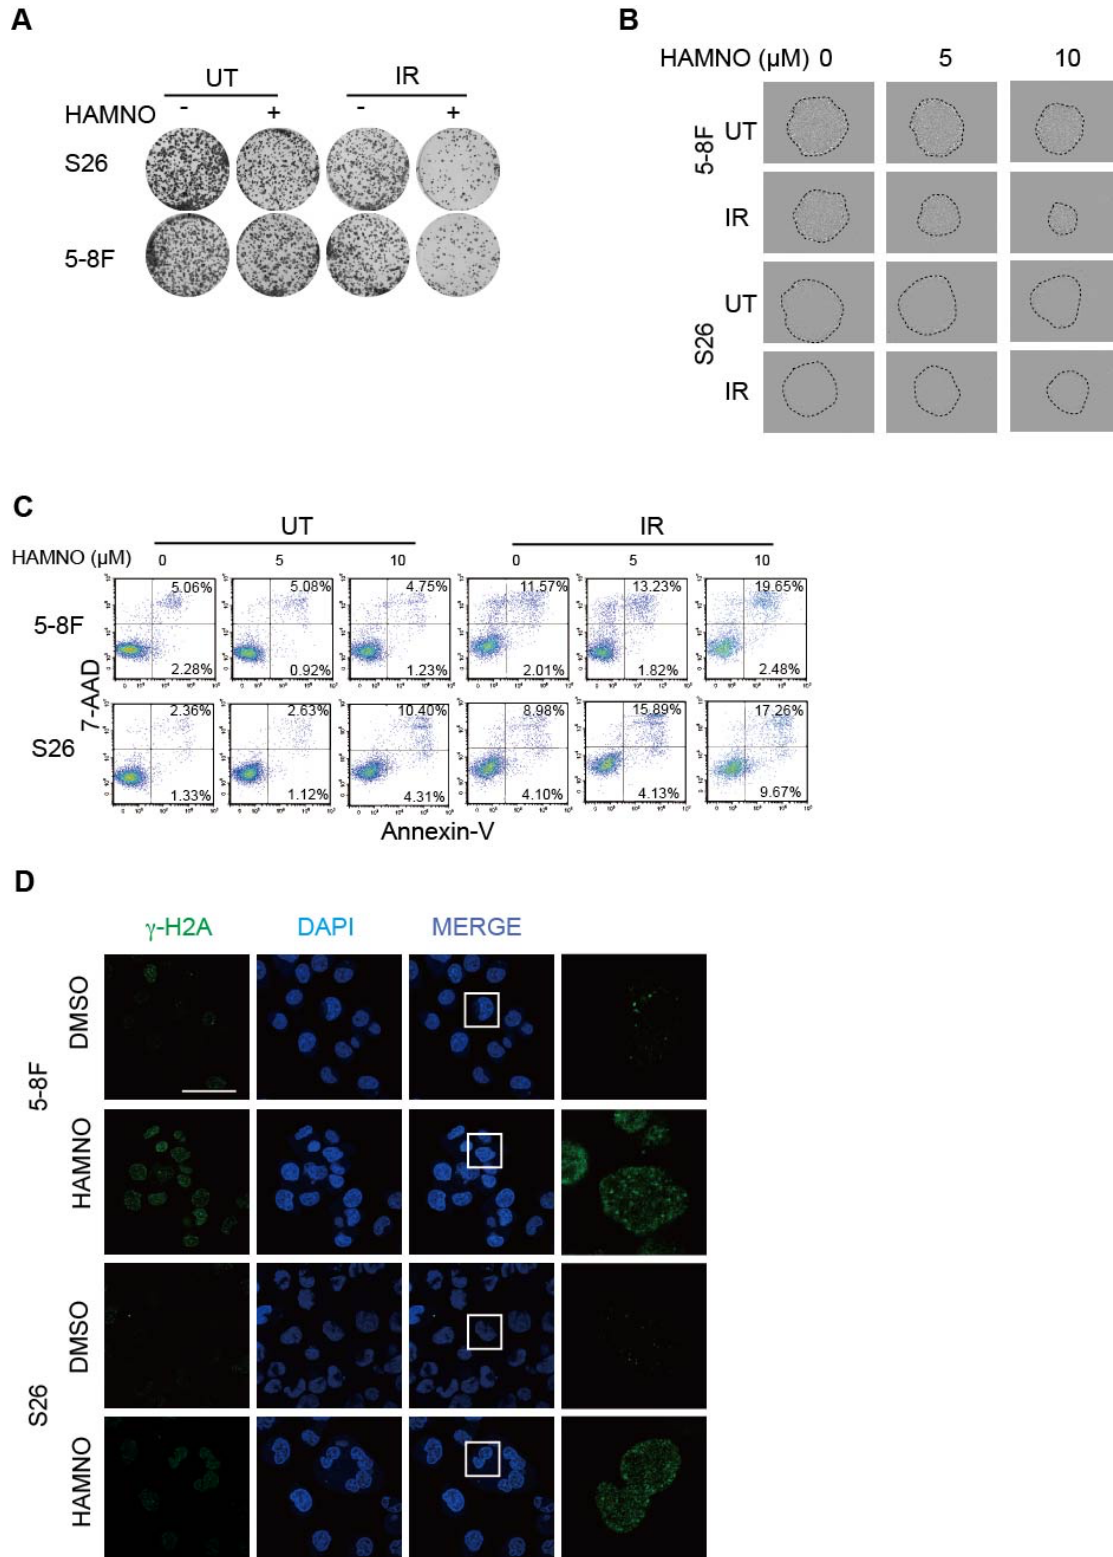

Additional file 1: Fig. S1

**a** Colony formation analysis of NPC cell lines treated with HAMNO, IR, or their combination. **b** Representative image of the tumor sphere formation assay in NPC cells treated with a single inhibitor or combination with IR after 12 days of cell

culture. Scale bar = 25/50  $\mu\text{m}$ . **c** Percentage of cells in apoptosis induced by RPAi or IR alone or in combination for 48 hours was determined via Annexin V/7-AAD staining and flow cytometry. **d** Representative images of  $\gamma\text{H2A}$  staining. Scale bar = 50  $\mu\text{m}$ .

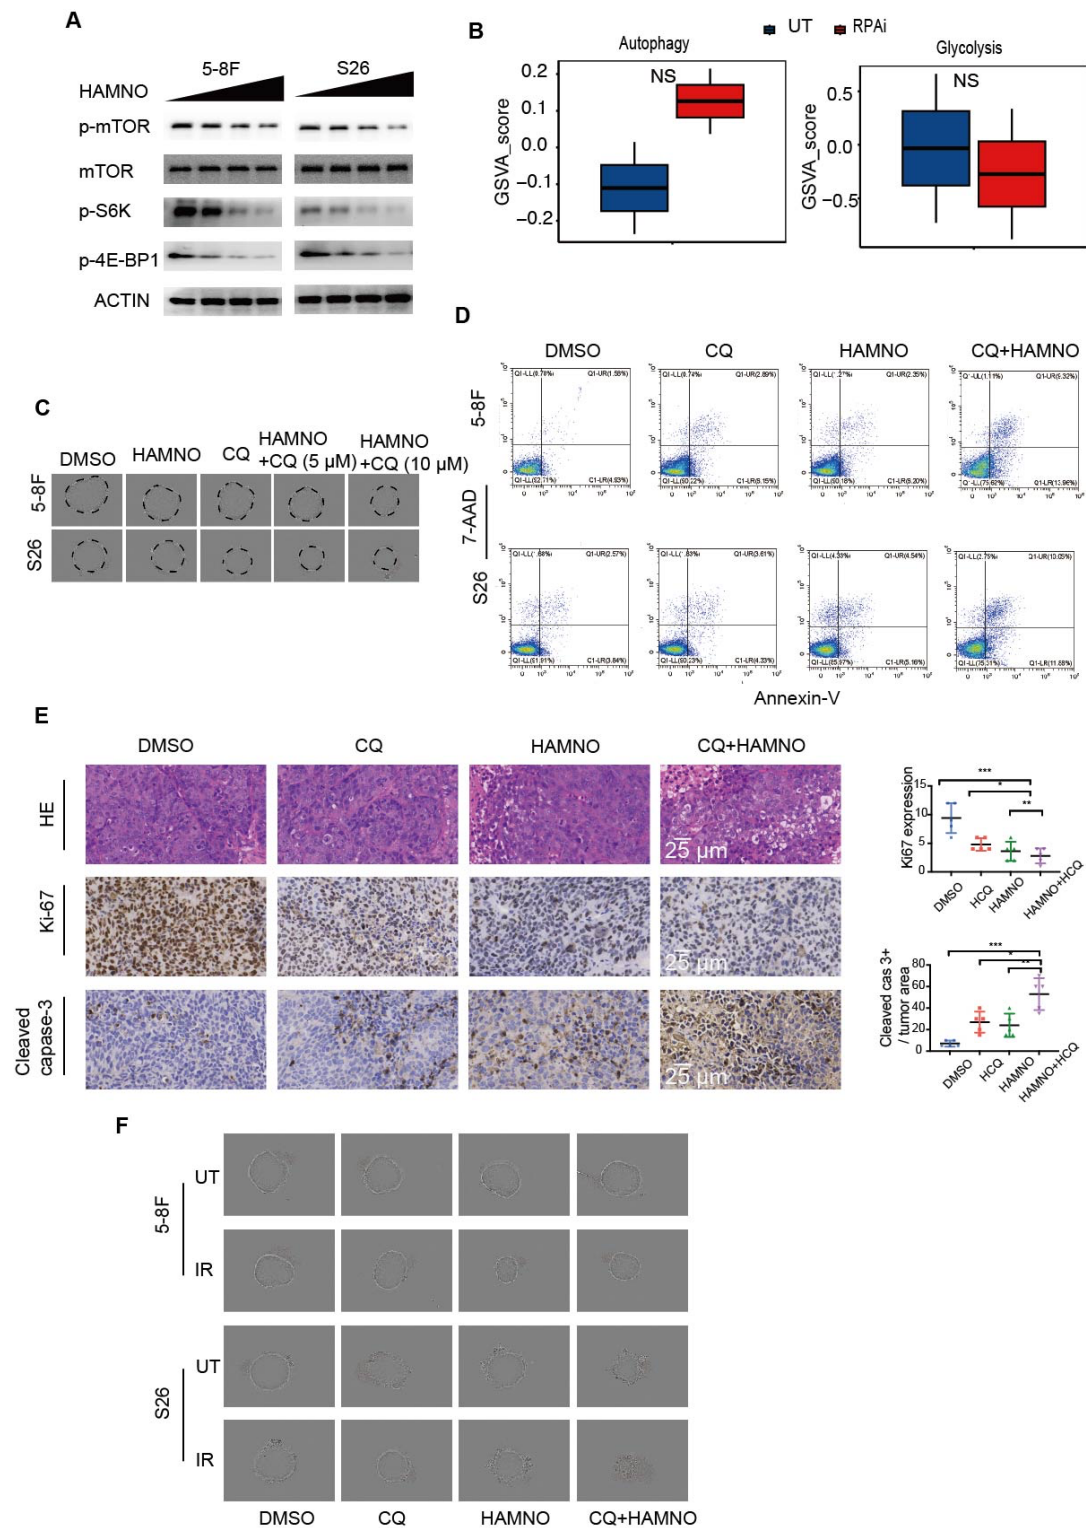

Additional file 1: Fig. S2

**a** 5-8F and S26 cells were treated with DMSO or HAMNO (10  $\mu$ M, 20  $\mu$ M or 30  $\mu$ M) for 48 hours. Immunoblot analyses of cell lysates were performed to determine the levels of pmTOR, total mTOR, pS6K, p-4E-BP1 and ACTIN. **b** 5-8F and S26 were

treated with HAMNO (15  $\mu$ M) for 48 h. Cells were collected and subjected to RNA-seq analysis. GSVA was completed to estimate the variation of different metabolic pathway activities in a nonsupervised manner. Each of the two cell lines was treated as a biological replicate. The GSVA scores for a gene set composed of autophagy-related and glycolysis genes were presented. GSVA scores of the two groups were compared using the Mann-Whitney U test. **c** Tumoroids treated with RPAi (5  $\mu$ M) or CQ or IR alone or in combination were captured by the IncuCyte system. **d** Percentage of cells in apoptosis induced by RPAi or CQ alone or in combination for 48 hours was determined via flow cytometry and Annexin V/7-AAD staining. **e** Representative images of HE and IHC with indicated antibodies in tumor tissues from S26 models (left). Scale bar = 25  $\mu$ m. IHC analysis of Ki67 and cleaved caspase-3 in tumor sections (right). **f** Tumoroids treated with HAMNO (5  $\mu$ M), CQ or IR alone or in combination were captured by the IncuCyte system.

Additional file 1: Fig. S3

primers

|                              |                                |
|------------------------------|--------------------------------|
| QP-hGABARAPL1-Forward        | <b>TTGTAGAGAAGGCTCCAAAAGCC</b> |
| <b>QP-hGABARAPL1-Reverse</b> | GGTCTCAGGTGGATTCTCTTCC         |
| <b>QP-hWIP11- Forward</b>    | CTTCAAGCTGGAACAGGTCACC         |
| <b>QP-hWIP11- Reverse</b>    | CGGAGAAGTTCAAGCGTGCAGT         |
| <b>QP-hSQSTM11- Forward</b>  | TGTGTAGCGTCTGCGAGGGAAA         |
| <b>QP-hSQSTM11- Reverse</b>  | AGTGTCCGTGTTTCACCTTCCG         |
